# Supplementary material for: Concurrent durvalumab and radiation therapy (DUART) followed by adjuvant durvalumab in patients with localized urothelial cancer of bladder: results from phase II study, BTCRC-GU15-023
Source: HighWire-hosted journal article supplement (doi:10.1136/jitc-2022-006551), 2023-02-01
Supplement: jitc-2022-006551supp002_data_supplement.pdf [file jitc-2022-006551supp002_data_supplement.pdf]

**Supplementary Figure 1a**Progression-free survival vs  
the presence of hydronephrosis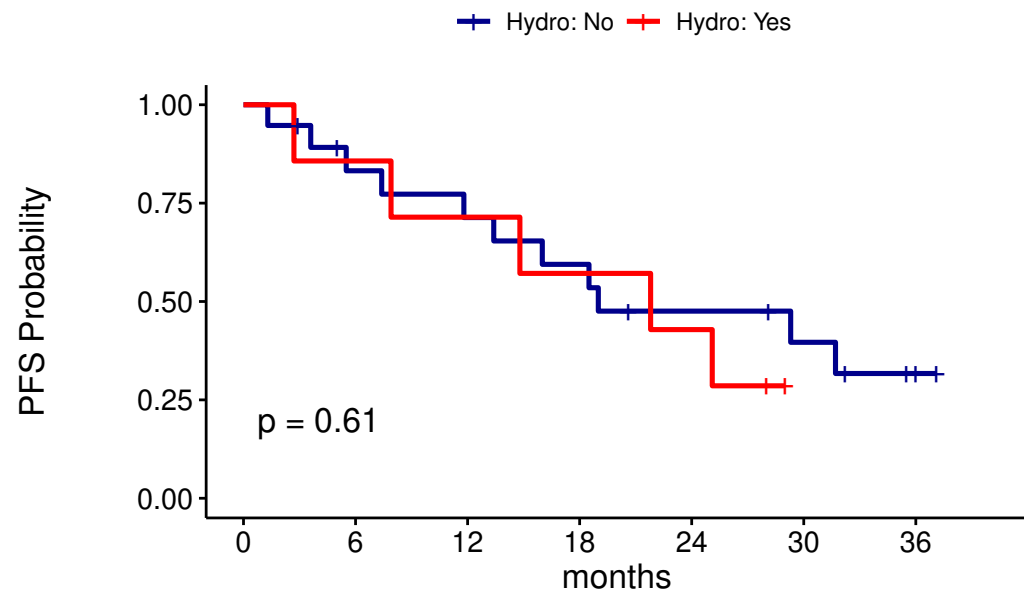

Number at risk

|            |        |    |    |    |    |    |    |
|------------|--------|----|----|----|----|----|----|
| Hydro: No  | 19     | 14 | 12 | 10 | 7  | 5  | 2  |
| Hydro: Yes | 7      | 6  | 5  | 4  | 3  | 0  | 0  |
|            | 0      | 6  | 12 | 18 | 24 | 30 | 36 |
|            | months |    |    |    |    |    |    |

**Supplementary Figure 1b**Overall survival vs  
the presence of hydronephrosis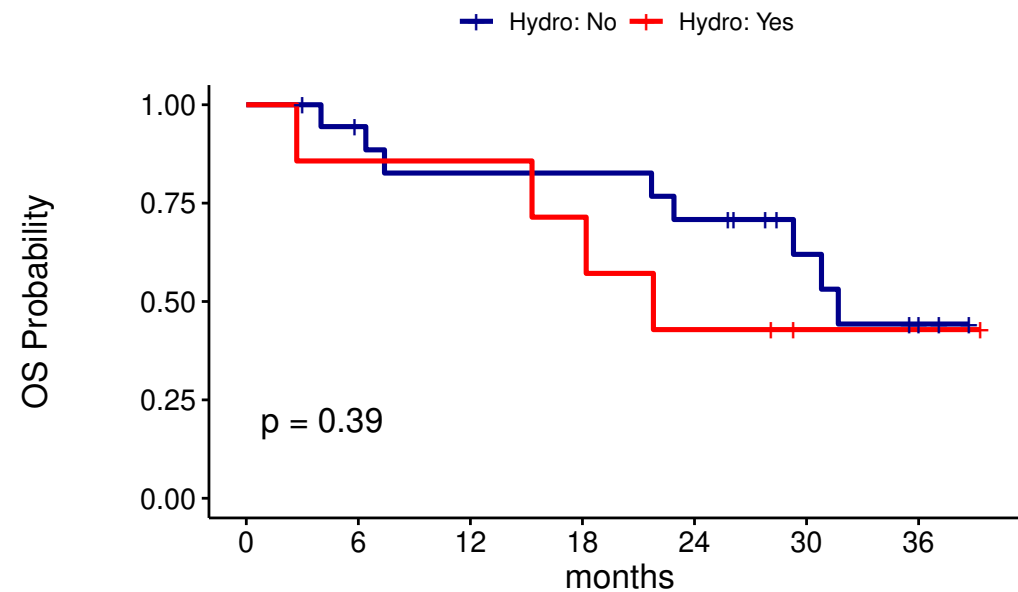

Number at risk

|            |        |    |    |    |    |    |    |
|------------|--------|----|----|----|----|----|----|
| Hydro: No  | 19     | 16 | 14 | 14 | 12 | 7  | 3  |
| Hydro: Yes | 7      | 6  | 6  | 5  | 3  | 1  | 1  |
|            | 0      | 6  | 12 | 18 | 24 | 30 | 36 |
|            | months |    |    |    |    |    |    |

**Supplementary Figure 1c**Progression-free survival vs  
TURBT completeness

—+ TURBT: complete —+ TURBT: incomplete

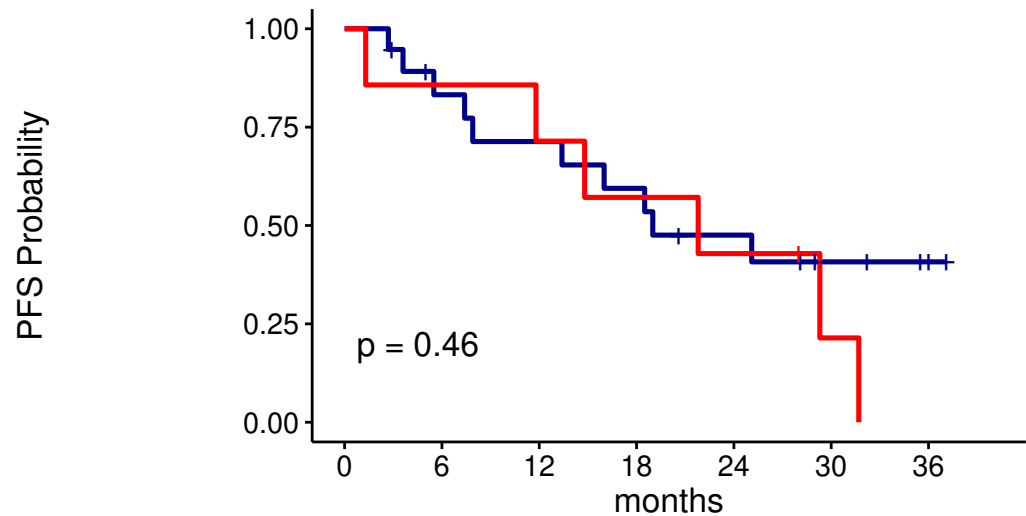**Supplementary Figure 1d**Overall survival vs  
TURBT completeness

—+ TURBT: complete —+ TURBT: incomplete

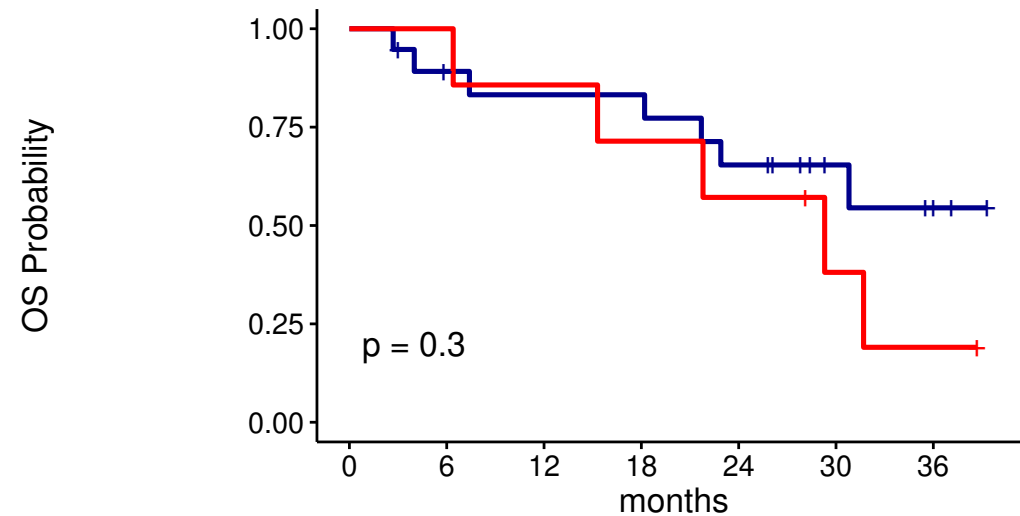

Number at risk

|                  | 0  | 6  | 12 | 18 | 24 | 30 | 36 |
|------------------|----|----|----|----|----|----|----|
| TURBT:complete   | 19 | 15 | 14 | 14 | 11 | 6  | 3  |
| TURBT:incomplete | 7  | 7  | 6  | 5  | 4  | 2  | 1  |
