# Supplementary material for: Concurrent durvalumab and radiation therapy (DUART) followed by adjuvant durvalumab in patients with localized urothelial cancer of bladder: results from phase II study, BTCRC-GU15-023
Source: HighWire-hosted journal article supplement (doi:10.1136/jitc-2022-006551), 2023-02-01
Supplement: jitc-2022-006551supp006_data_supplement.pdf [file jitc-2022-006551supp006_data_supplement.pdf]

Table 1: Demographics

| Characteristics                   | Total N=26<br>(N [%])                                                                    |
|-----------------------------------|------------------------------------------------------------------------------------------|
| Median age (range), years         | 74 (range 51-94)                                                                         |
| Sex                               | Male 19 (73.1%)<br>Female 7 (26.9%)                                                      |
| Race                              | White 24 (92.3%)<br>Black 1 (3.8%)<br>Unknown 1 (3.8%)                                   |
| TNM Stage                         | T2 N0 M0 10 (38.5%)<br>T3 N0 M0 6 (23.1%)<br>T4 N0 M0 2 (7.6%)<br>T2-4 N1-2 M0 8 (30.8%) |
| Unresectable                      | Yes 9 (34.6%)<br>No 17 (65.4%)                                                           |
| Unfit for surgery                 | Yes 13 (50%)<br>No 13 (50%)                                                              |
| Cisplatin ineligible              | Yes 23 (88.5%)<br>No 3 (11.5%)                                                           |
| ECOG Status                       | 0 – 1 19 (73.1%)<br>2 7 (26.9%)                                                          |
| Extent of TURBT per urologist     | Complete 19 (73.1%)<br>Incomplete 7 (26.9%)                                              |
| Presence of Hydronephrosis        | Yes 7 (26.9%)<br>No 19 (73.1%)                                                           |
| Neoadjuvant chemotherapy exposure | Yes 4 (15.4%)<br>No 22 (84.6%)                                                           |
| Tumor PD-L1 status                | Positive 10 (38.5%)<br>Negative 16 (61.5%)                                               |
| Histology                         | Pure urothelial 15 (57.7%)<br>Mixed urothelial with variant* 11 (42.3%)                  |

\*Mixed variants histology in addition to pure urothelial component included: squamous =3; sarcomatoid=1; micropapillary=1; glandular=4; sarcomatoid+ squamous=1; micropapillary+ glandular=1. Please refer to supplementary table 1 for further details.
