# Supplementary figures and images for: Concurrent durvalumab and radiation therapy (DUART) followed by adjuvant durvalumab in patients with localized urothelial cancer of bladder: results from phase II study, BTCRC-GU15-023
Source: HighWire-hosted journal article supplement (doi:10.1136/jitc-2022-006551), 2023-02-01

## Supplementary Figure 2

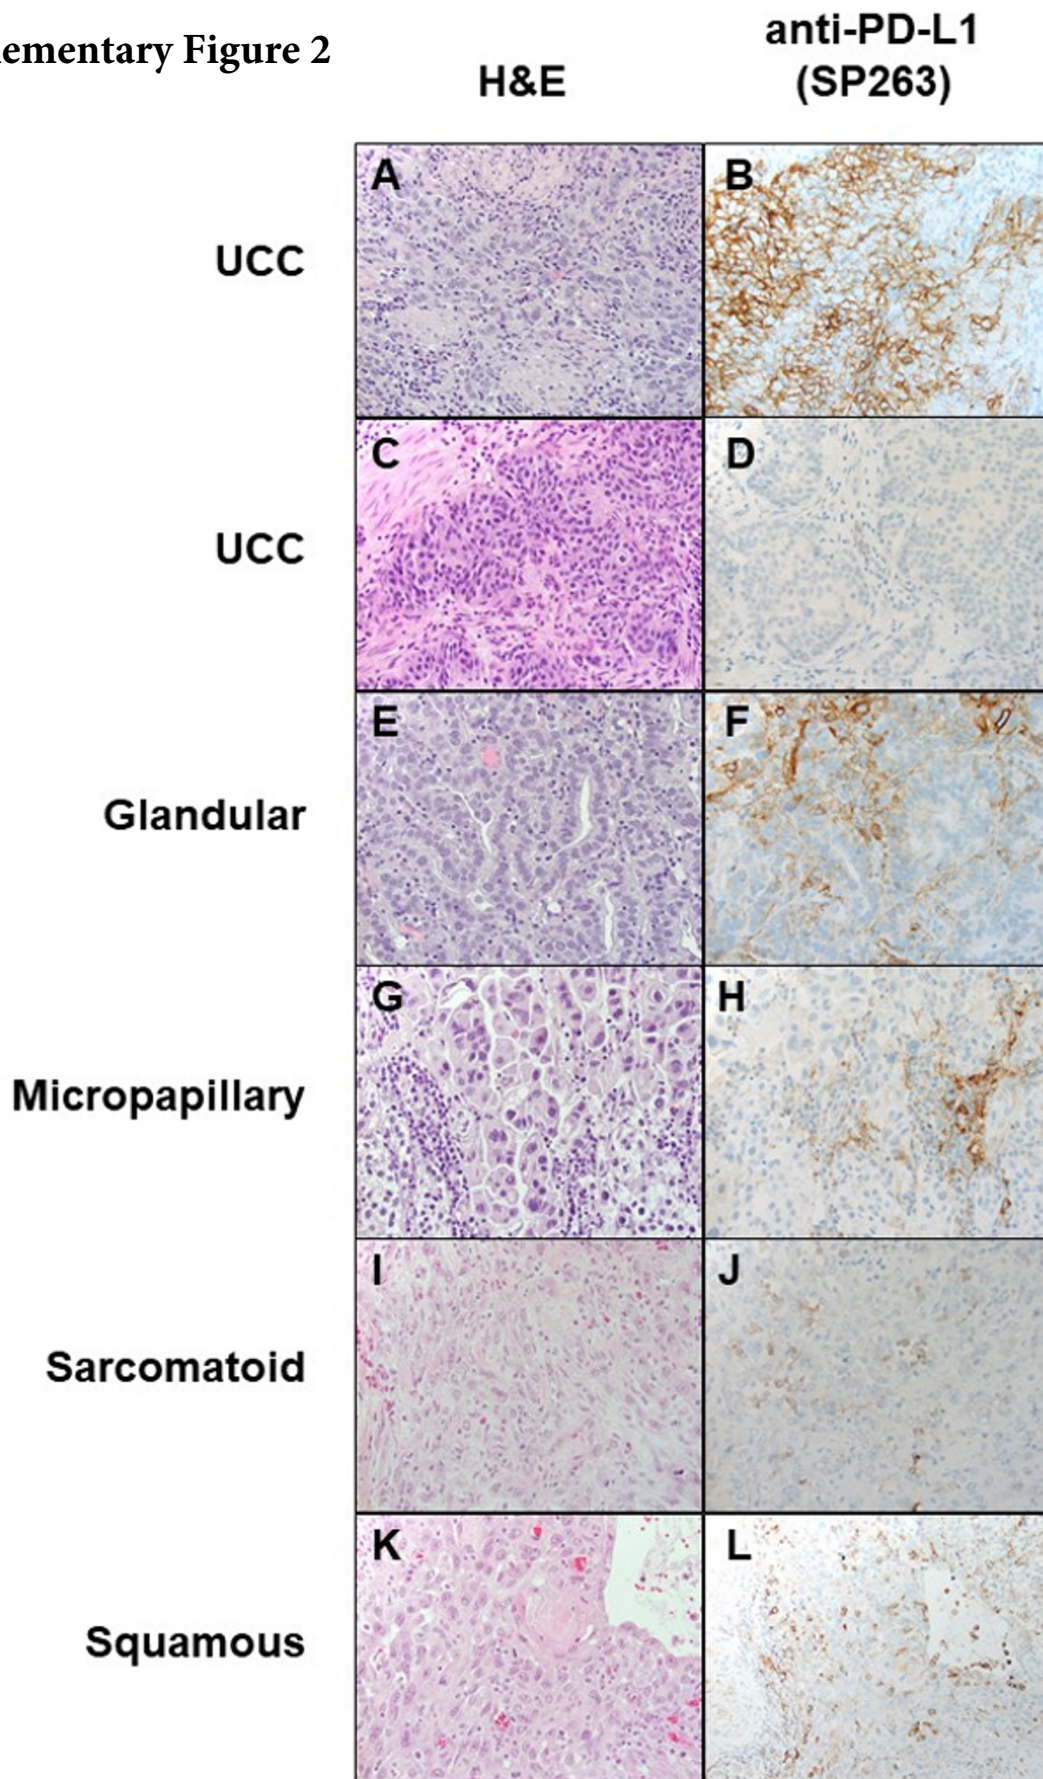

Supplement: jitc-2022-006551supp003_data_supplement.pdf [file jitc-2022-006551supp003_data_supplement.pdf]

## Supplemental Figure 4

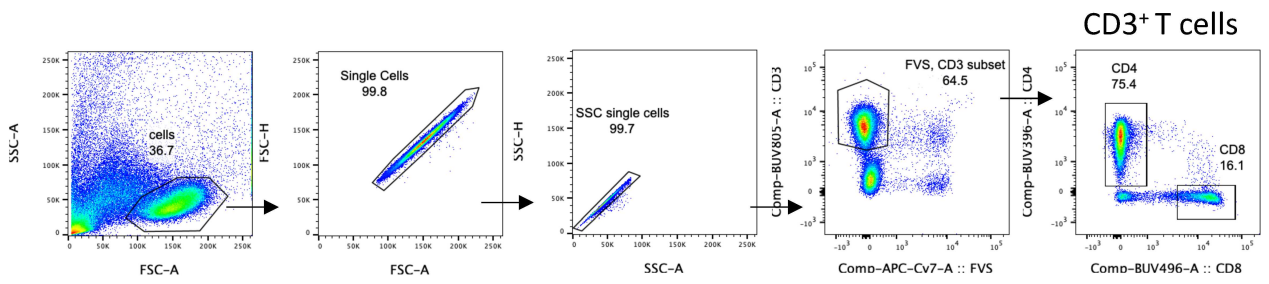Gated on CD8<sup>+</sup> T cells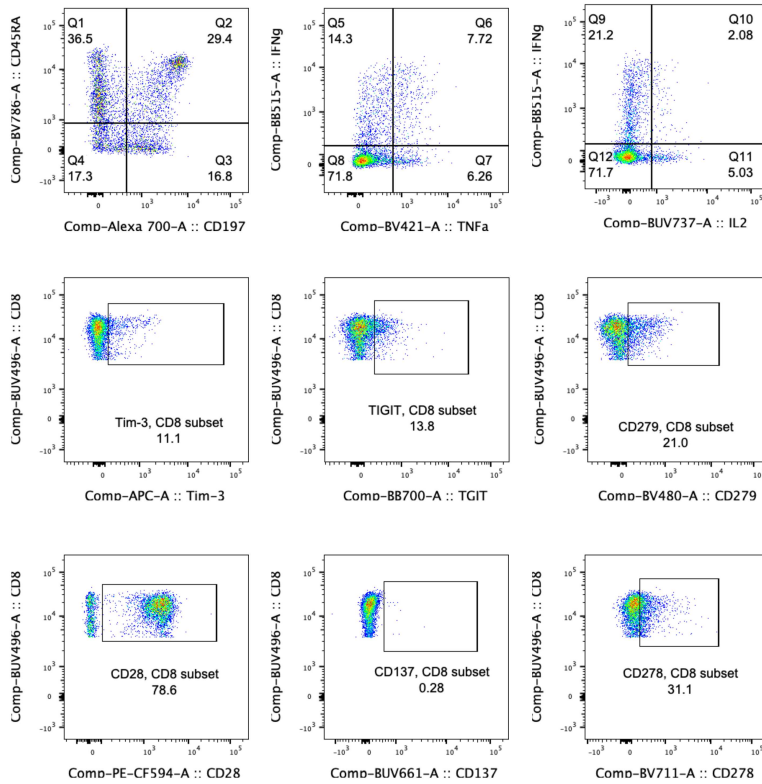

Supplement: jitc-2022-006551supp005_data_supplement.pdf [file jitc-2022-006551supp005_data_supplement.pdf]
